# Supplementary material for: Biomorphic triangulations: constructing an additional formation pathway to achieve hierarchical self-evolution in biomorphs
Source: Royal Society of Chemistry journal article supplement (doi:10.1039/d0qm00723d), 2020-10-20
Supplement: d0qm00723d1.pdf [file d0qm00723d1.pdf]

Supporting Information for:

**Biomorphic Triangulations: Constructing an Additional Formation Pathway to Achieve Hierarchical Self-Evolution in Biomorphs**

Yifu Chen,<sup>1,2†</sup> Shuo Wang,<sup>1,2†</sup> Junbo Gong,<sup>1,2\*</sup> Jingkang Wang<sup>1,2</sup>

<sup>1</sup> State Key Laboratory of Chemical Engineering, School of Chemical Engineering and Technology, Tianjin University, Weijin Road 92, Tianjin 300072, China.

<sup>2</sup> Collaborative Innovation Center of Chemical Science and Engineering, Weijin Road 92, Tianjin 300072, China.

† These authors contributed equally to this work.

\*To whom correspondence should be sent: junbo\_gong@tju.edu.cn.

*Mater. Chem. Front.*

**List of Contents**

|                                          |           |
|------------------------------------------|-----------|
| <b>Section S1: Materials</b>             | <b>S2</b> |
| <b>Section S2: Supplementary Figures</b> | <b>S3</b> |

### **Section S1: Materials**

All reagents were commercially available and used as received without further purification. Sodium meta-silicate pentahydrate ( $\text{Na}_2\text{SiO}_3 \cdot 5\text{H}_2\text{O}$ , 99%), barium chloride dihydrate ( $\text{BaCl}_2 \cdot 2\text{H}_2\text{O}$ , 99%) and magnesium chloride hexahydrate ( $\text{MgCl}_2 \cdot 6\text{H}_2\text{O}$ , 99%) were purchased from Tianjin Kermel Chemical Reagent. The concentrated hydrochloric ( $\text{HCl}$ , 36%-38%) was purchased from Real&Lead Chemical. Acetone (99.5%) and ethanol (99.7%) were purchased from Rionlon. 0.1M  $\text{HCl}$  was obtained by diluting concentrated hydrochloric acid with water for the adjustment of pH. All water used in our experiments was distilled deionised water and bubbled with  $\text{N}_2$  (99.999%, purchased from Tianjin Liufang Industrial Gas Co., Ltd) for more than 2 hours to drive off pre-dissolved  $\text{CO}_2$ . Aluminum plate (40 cm×40 cm×0.5 mm) was manually cut into 4 cm×2 cm and used as growth substrate.

***Section S2: Supplementary Figures***

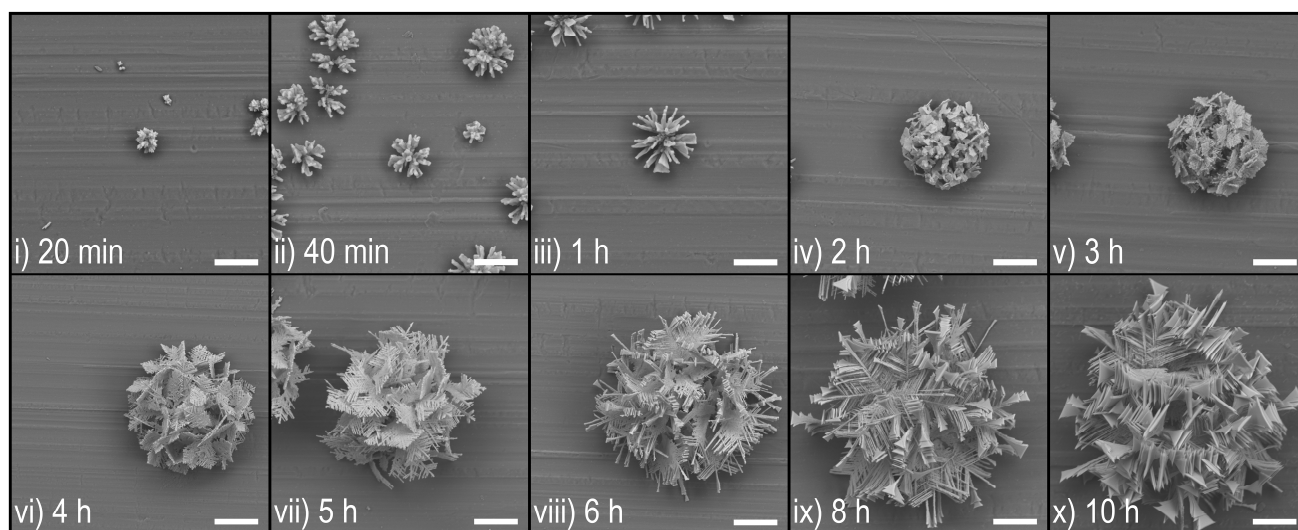

**Fig. S1** Original images of the self-evolution process of "triangles".

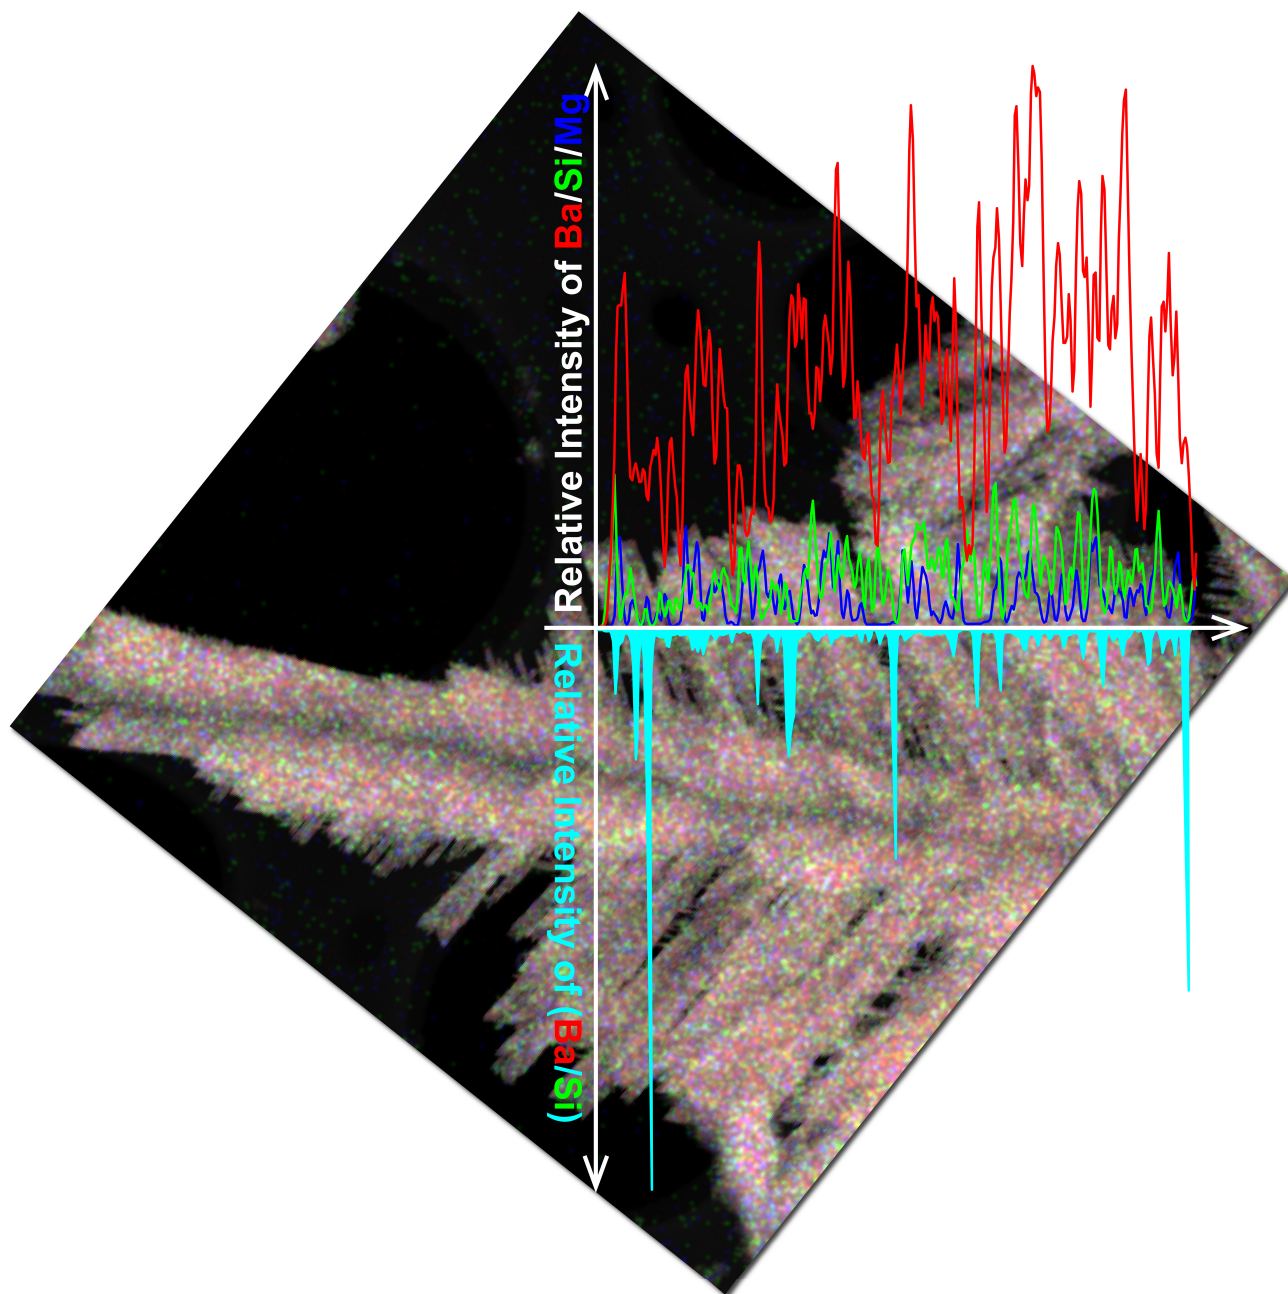

**Fig. S2** Relative intensity profile of Ba, Si, Mg and Ba/Si of a forming branch.
